# Supplementary material for: The genome of medicinal leech (Whitmania pigra) and comparative genomic study for exploration of bioactive ingredients
Source: PubMed Central journal article supplement (PMC8787918; doi:10.1186/s12864-022-08290-5), 2022-01-24
Supplement: 12864_2022_8290_MOESM1_ESM.pdf [file 12864_2022_8290_MOESM1_ESM.pdf]

## Supplementary information

### The genome of medicinal leech (*Whitmania pigra*) and comparative genomic study for exploration of bioactive ingredients

Lei Tong<sup>1, #</sup>, Shao-Xing Dai<sup>2, #</sup>, De-Jun Kong<sup>1, #</sup>, Peng-Peng Yang<sup>2</sup>, Xin Tong<sup>2</sup>, Xiang-Rong Tong<sup>1</sup>, Xiao-Xu Bi<sup>1</sup>, Yuan Su<sup>1</sup>, Yu-Qi Zhao<sup>3</sup>, Zi-Chao Liu<sup>1, \*</sup>

<sup>1</sup>Engineering Research Center for Exploitation and Utilization of Leech Resources in Universities of Yunnan Province, School of Agronomy and Life Sciences, Kunming University, Kunming 650214, China

<sup>2</sup>State Key Laboratory of Primate Biomedicine Research, Institute of Primate Translational Medicine, Kunming University of Science and Technology, Kunming 650500, China

<sup>3</sup>Department of Integrative Biology and Physiology, University of California, Los Angeles, Los Angeles, CA 90095, USA

Authors email:

Lei Tong: 1501159559@qq.com

Shao-Xing Dai: daishx08@gmail.com

De-Jun Kong: kongdj05@hotmail.com

Peng-Peng Yang: yangpp@lpbr.cn

Xin Tong: tongxin0013@163.com

Xiang-Rong Tong: txiangrong@163.com

Xiao-Xu Bi: 279781667@qq.com

Yuan Su: suyuankm@163.com

Yu-Qi Zhao: zhaoyuqi616@gmail.com

Zi-Chao Liu: abclzc@aliyun.com

#These authors contributed equally to this work

\*Corresponding author: Zi-Chao Liu

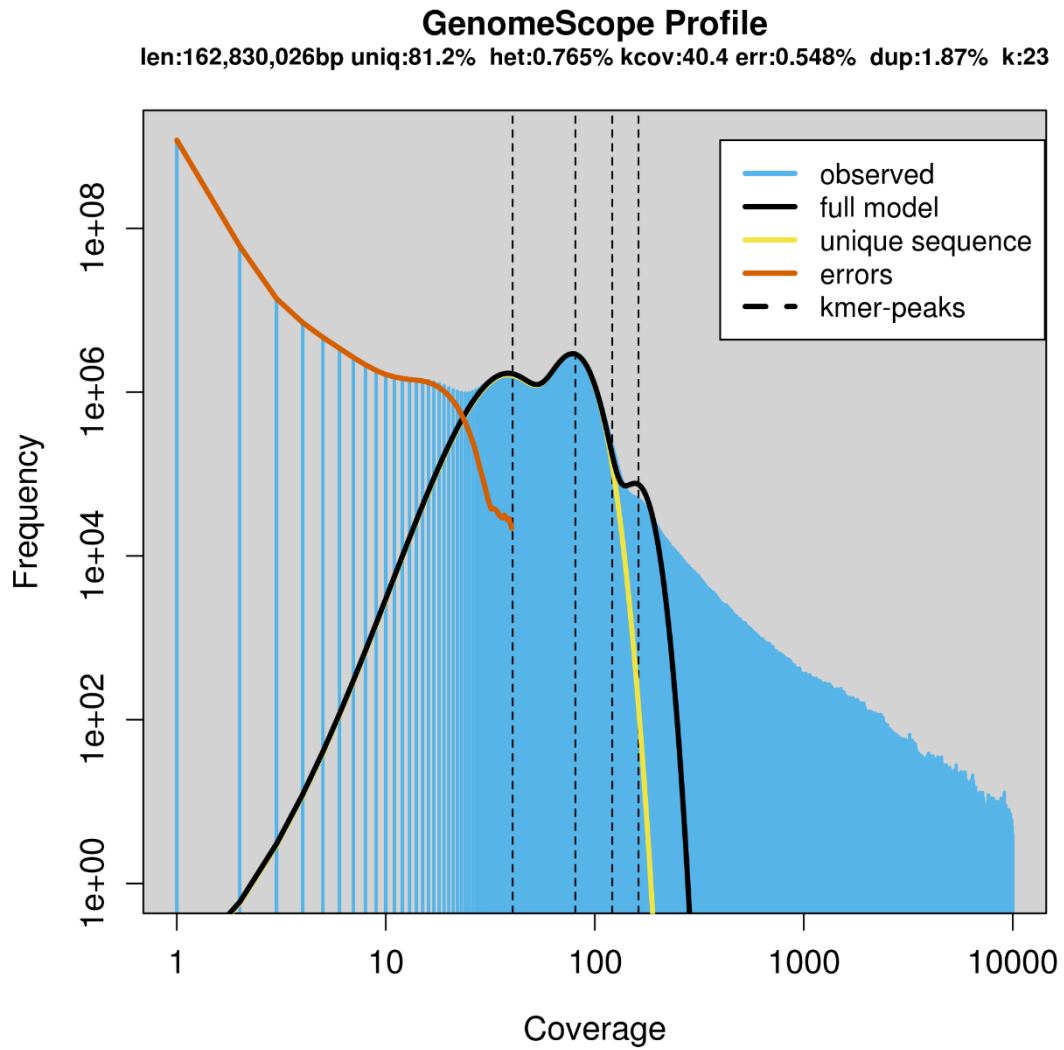

**Figure S1.** GenomeScope Analysis of the 23-mers for *W. Pigra* genome sequencing data. Estimate of the heterozygous portion is 0.765%. The estimated genome size of *W. Pigra* was ~ 162 Mbp

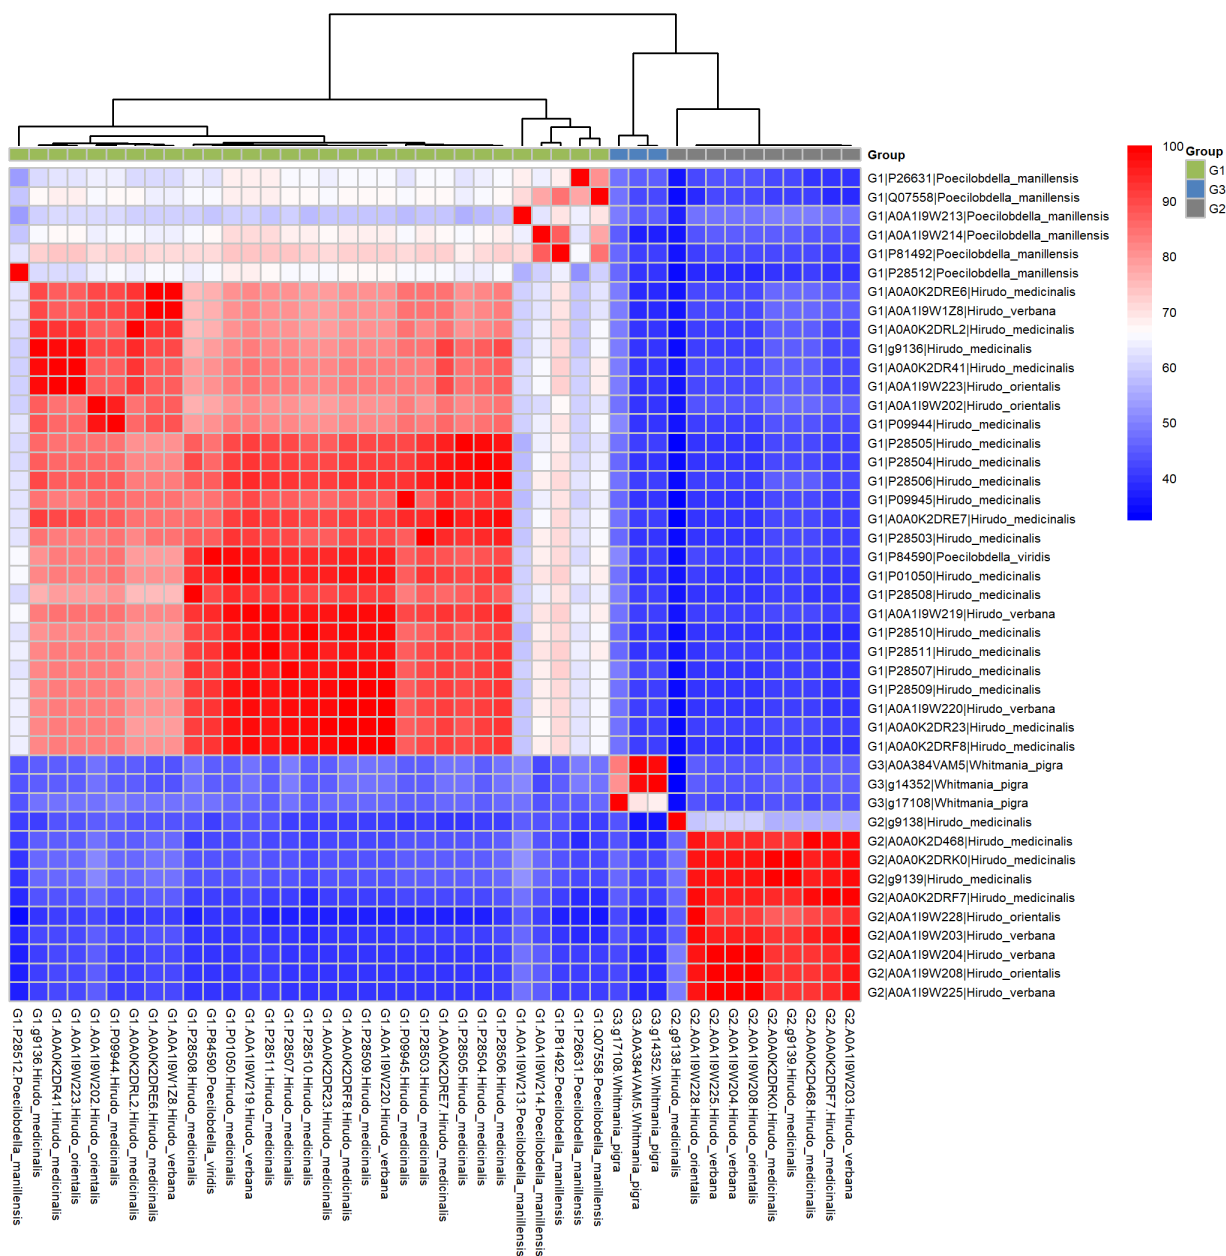

**Figure S2.** The heatmap displays the pairwise similarities values among the Hirudin sequences in **Figure 4**. The Hirudin sequences belong to G1, G2, G3, respectively. Within the group, the pairwise similarities of Hirudins are more than 60%. In contrast, in different groups, the pairwise similarities of Hirudins are between 30% and 60%. Whether between G2 and G1 or between G3 and G1, the pairwise similarities are always below 60%.
